# Supplementary material for: The tobacco-specific carcinogen-operated calcium channel promotes lung tumorigenesis via IGF2 exocytosis in lung epithelial cells
Source: PubMed Central journal article supplement (PMC5052689; doi:10.1038/ncomms12961), 2016-09-26
Supplement: ncomms12961-s1.pdf [file ncomms12961-s1.pdf]

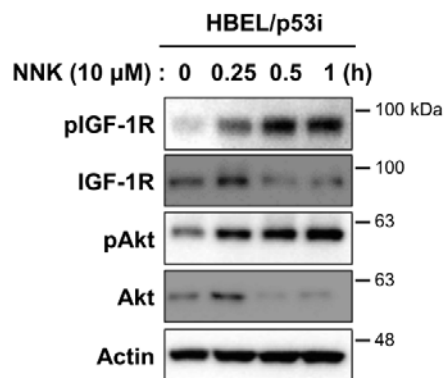

**Supplementary Fig. 1. A rapid activation of IGF-1R and Akt in HBEL/p53i cells by NNK treatment.** Growth factor-starved HBEL/p53i cells were exposed to NNK for the indicated times. The expression levels of total and phosphorylated IGF-1R and Akt were determined by Western blot analysis.

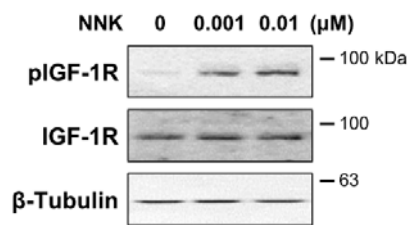

**Supplementary Fig. 2. NNK-induced phosphorylation of IGF-1R in BEAS-2B cells.** BEAS-2B cells were treated with 0.001 or 0.01  $\mu$ M NNK for 15 min. Cell lysates were subjected to Western blot analysis.

**a**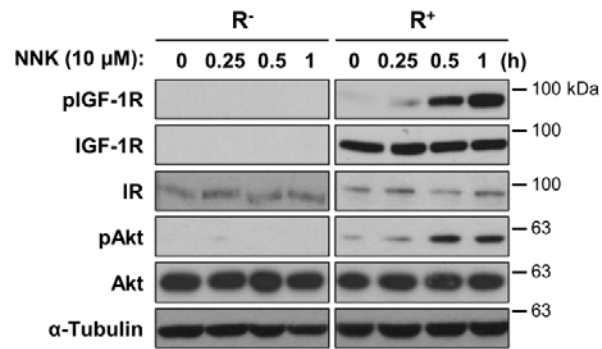**b**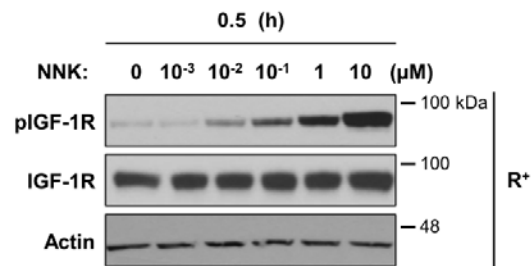

**Supplementary Fig. 3. Time- and dose-dependent IGF-1R activation by NNK treatment in R<sup>+</sup> cells.** Cells were exposed to NNK (10 μM) for different time intervals (**a**) or treated with various concentrations (0.001, 0.01, 0.1, 1, and 10 μM) of NNK for 0.5 h (**b**). NNK-mediated IGF-1R activation was determined by Western blot analysis.

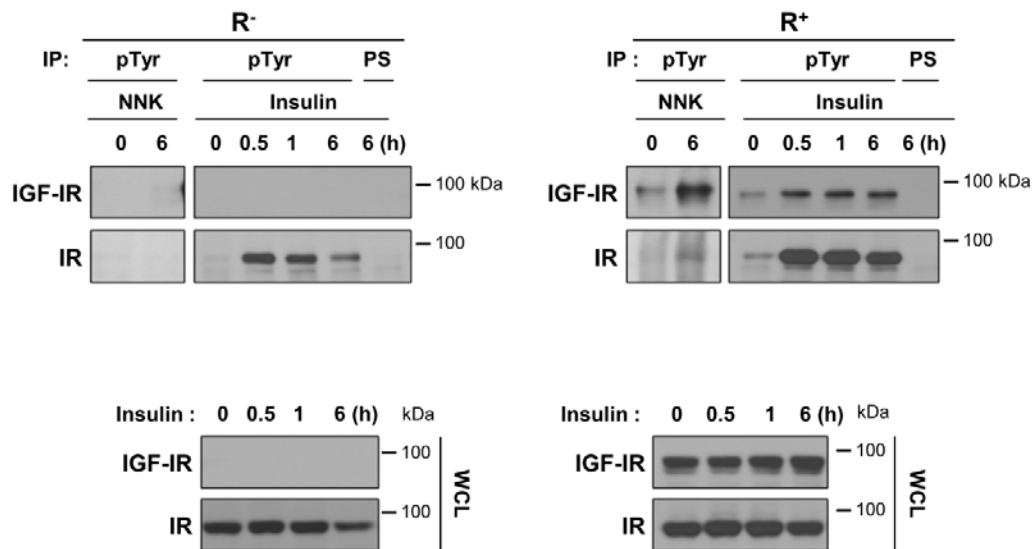

**Supplementary Fig. 4. NNK specifically phosphorylates IGF-1R in R<sup>+</sup> cells.** R<sup>-</sup> and R<sup>+</sup> cells were treated with NNK or insulin for the indicated times. Cell lysates were immunoprecipitated with anti-phosphotyrosine (pTyr) antibodies and then were subjected to Western blot analysis to detect activation of IGF-1R and IR using anti-IGF-1R or anti-IR antibodies. PS: preimmune serum.

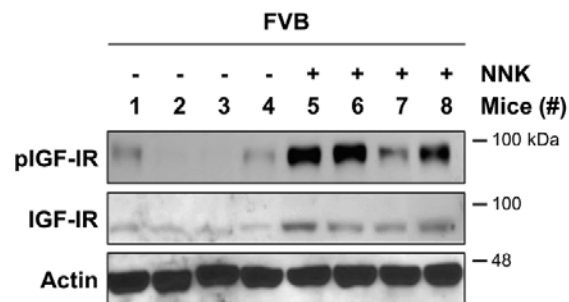

**Supplementary Fig. 5. Activation of IGF-1R in the lung tissues from NNK-treated FVB mice.** Lysates were prepared and analyzed by Western blot to determine the protein level of pIGF-1R in the lung from vehicle- or NNK-treated FVB mice.

**a**

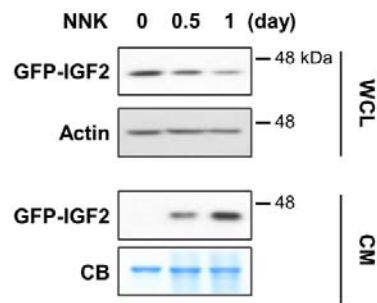

**b**

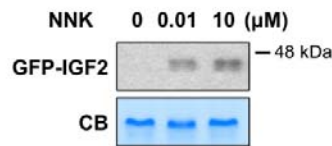

**Supplementary Fig. 6. NNK-mediated increase in IGF2 secretion.** BEAS-2B/GFP-IGF2 cells were exposed to 0.01  $\mu$ M (b) or 10  $\mu$ M (a, b) NNK for the indicated time intervals (a) or for 15 min (b). Whole-cell lysates (WCL) or conditioned media (CM) were prepared, and NNK-induced IGF2 secretion was determined by Western blot analysis. Coomassie Brilliant Blue staining (CB) was used as the loading control.

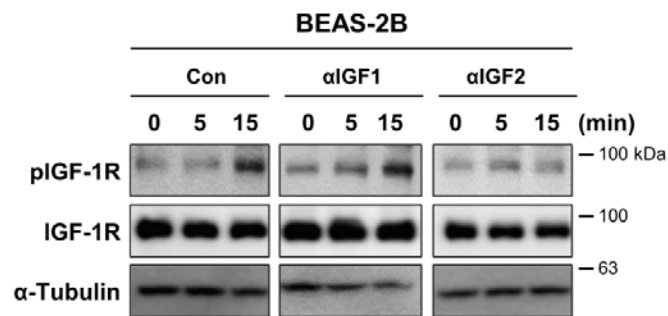

**Supplementary Fig. 7. Blockade of NNK-induced IGF-1R phosphorylation by treatment with IGF2 neutralizing antibodies.** BEAS-2B cells were pretreated with IGF1 or IGF2 neutralizing antibodies. Cells were then exposed to NNK for 5 and 15 min. Cell lysates were subjected to Western blot analysis.

**a**

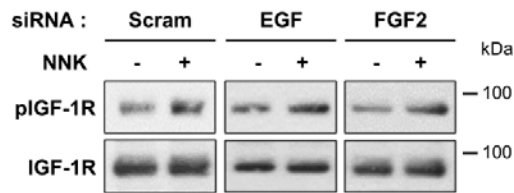

**b**

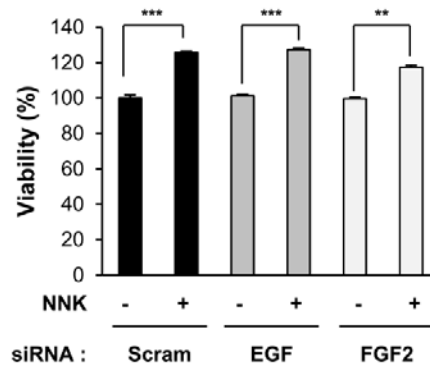

**Supplementary Fig. 8. Effects of the ablation of FGF or EGF signaling on the NNK-induced increases in IGF-1R phosphorylation and cell viability.** (a) BEAS-2B cells were transfected with scrambled siRNAs or siRNAs against EGF or FGF2 and then stimulated with NNK for 15 min. Cell lysates were determined by Western blot analysis. (b) BEAS-2B cells were transiently transfected with scrambled siRNAs or siRNAs against EGF or FGF2. NNK-mediated changes in cell viability were determined by the MTT assay.



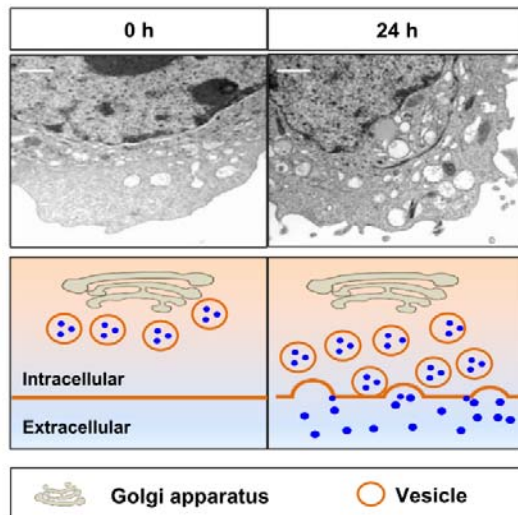

**Supplementary Fig. 9. NNK can increase vesicle-like structure.** Representative TEM images showing localization of vesicles after treatment with NNK for 24 h. Scale bar: 1  $\mu$ m.

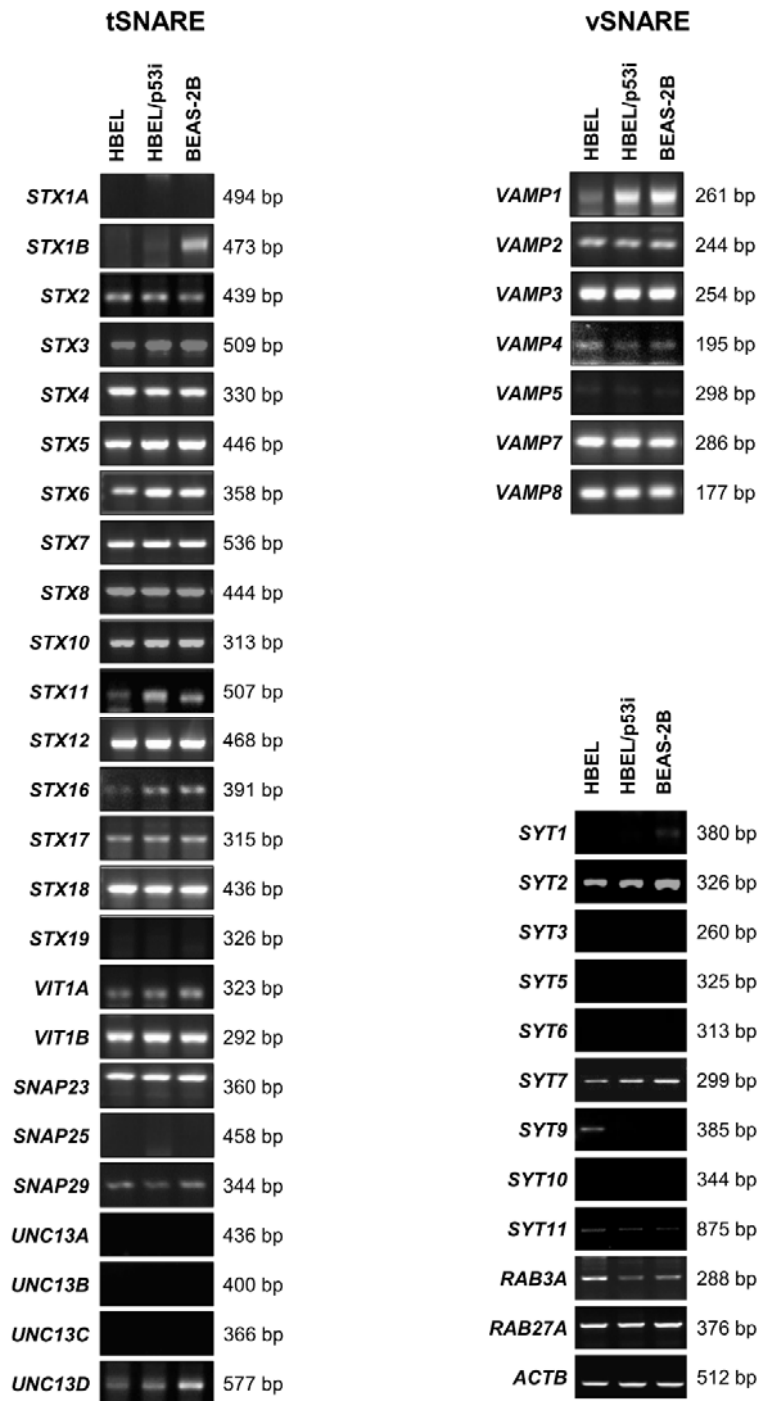

**Supplementary Fig. 10. Basal expression of SNAREs, synaptotagmins, and Rabs in lung epithelial cells, determined by RT-PCR analysis.**

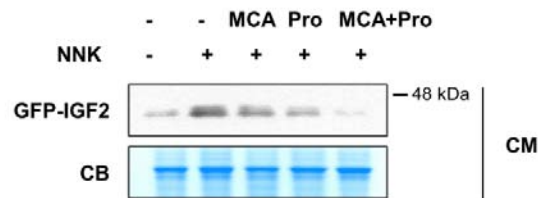

**Supplementary Fig. 11.** NNK induced IGF2 secretion *via*  $\beta$ -AR and nAChR. BEAS-2B cells were transfected with GFP-IGF2 expression vectors. After pretreatment with mecamylamine (10  $\mu$ M), propranolol (10  $\mu$ M), or both for 3 h, cells were further exposed to NNK (0.01  $\mu$ M) for 15 min. CM from these cells were subjected to Western blot analysis.

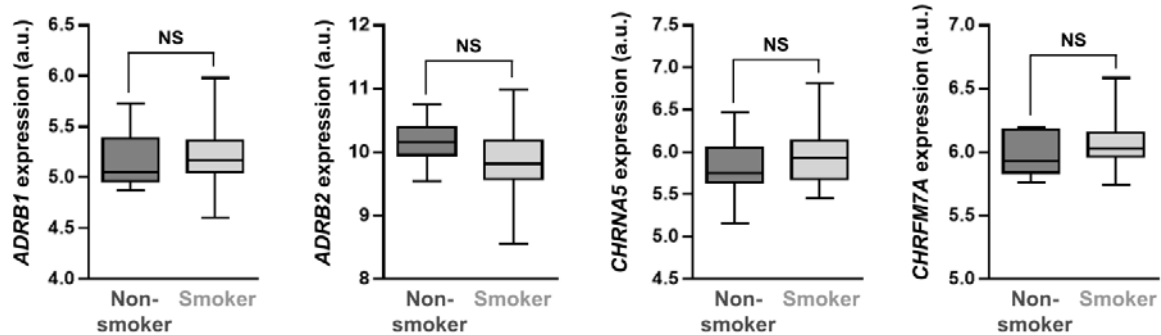

**Supplementary Fig. 12. No significant difference in the expression of *ADRB1*, *ADRB2*, *CHRNA5*, and *CHRFM7A* (*CHRNA7*) expression between smokers and non-smokers.** Representative results showing no significant difference in the *ADRB1*, *ADRB2*, *CHRNA5*, and *CHRFM7A* (*CHRNA7*) expressions between smokers and non-smokers. Analysis of a GEO dataset (GDS3257) to determine these gene expression in noninvolved normal lung tissues derived from patient with early stage (stage I-II) lung adenocarcinoma was performed by using GEO dataset analysis tools. NS: not significant compared with non-smokers.

**a**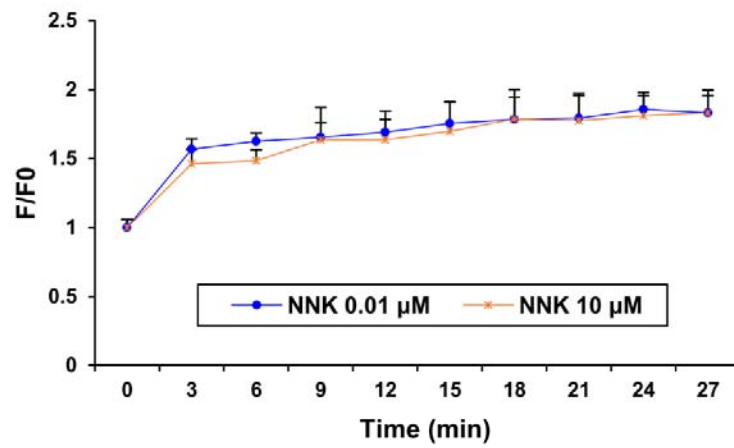**b**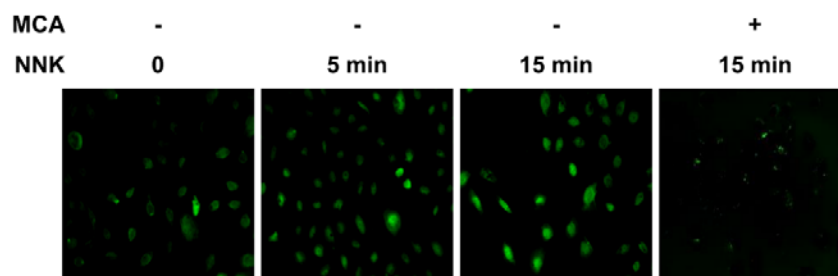

**Supplementary Fig. 13. Increase in intracellular Ca<sup>2+</sup> levels by treatment with NNK.** (a) Time-lapse imaging of Fluo-4 AM fluorescence signals from HBEL/p53i cells exposed to NNK. (b) Fluo-4 AM-labeled HBEL/p53i cells, untreated or pretreated with mecamylamine (MCA), were exposed to NNK for 5 or 15 min. The green fluorescence signals were visualized using fluorescence microscopy.

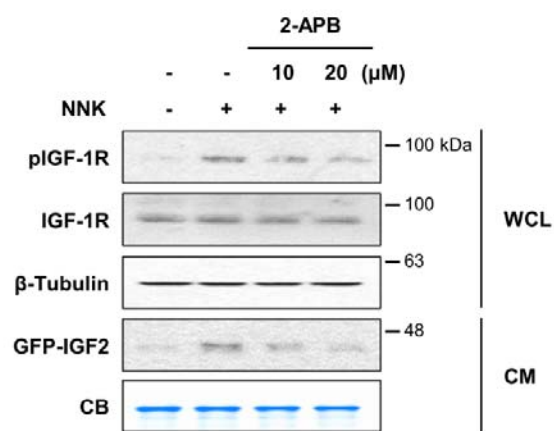

**Supplementary Fig. 14. Blockade of IP<sub>3</sub> receptor partially inhibits NNK-induced IGF2 secretion and IGF-1R phosphorylation.** BEAS-2B cells were pretreated with 2-APB for 3 h, and then exposed to NNK for 15 min. IGF-1R phosphorylation in WCL and IGF2 secretion in the CM were determined by Western blot analysis.

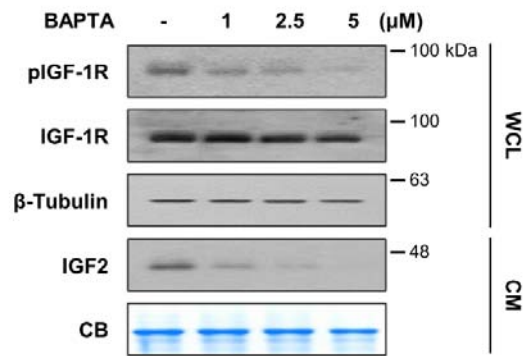

**Supplementary Fig. 15. Basal intracellular  $\text{Ca}^{2+}$  level can induce IGF2 secretion and IGF-1R phosphorylation.** BEAS-2B cells were treated with BAPTA-AM for 3 h. IGF-1R phosphorylation in WCL or IGF2 secretion in the CM were analyzed by Western blot analysis.

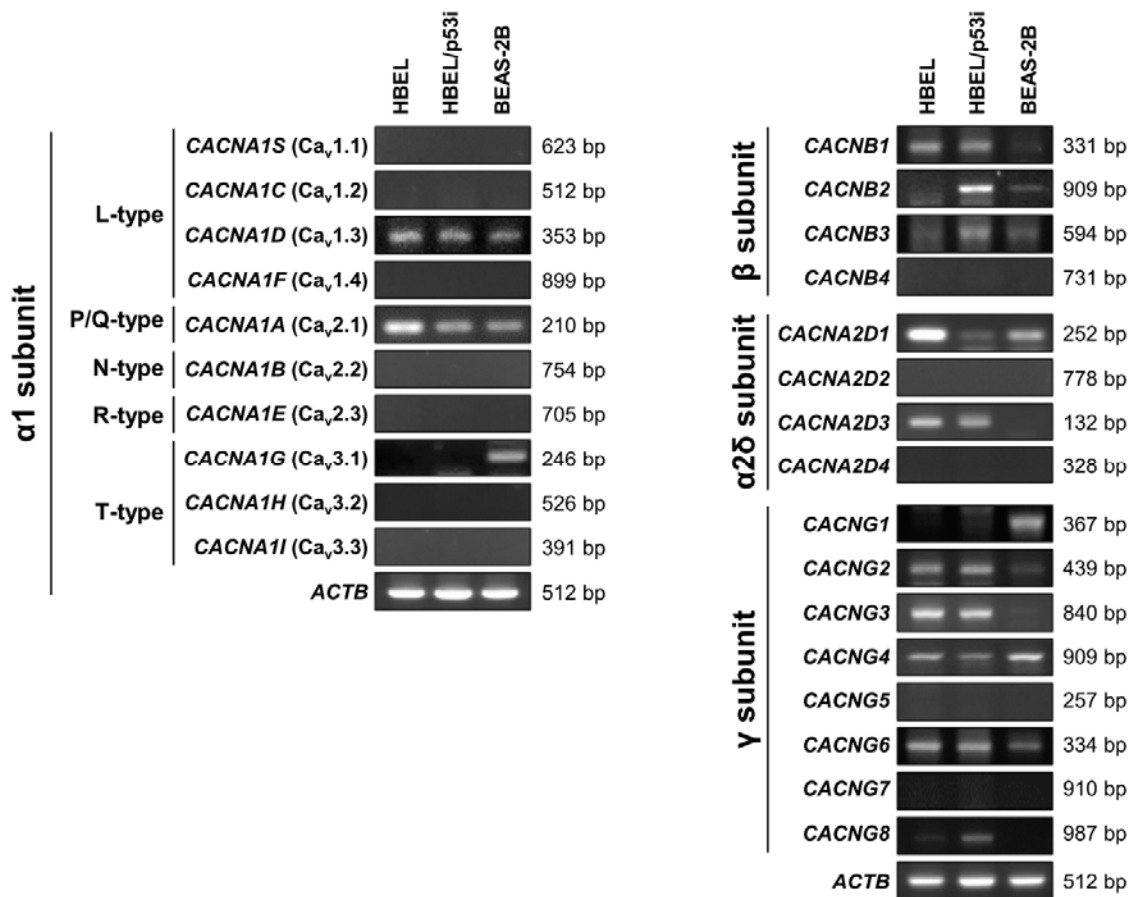

**Supplementary Fig. 16. Basal expression of voltage-dependent calcium channel subunits in lung epithelial cells.** The mRNA expression of voltage-dependent calcium channel subunits in lung epithelial cells was screened by RT-PCR analysis.



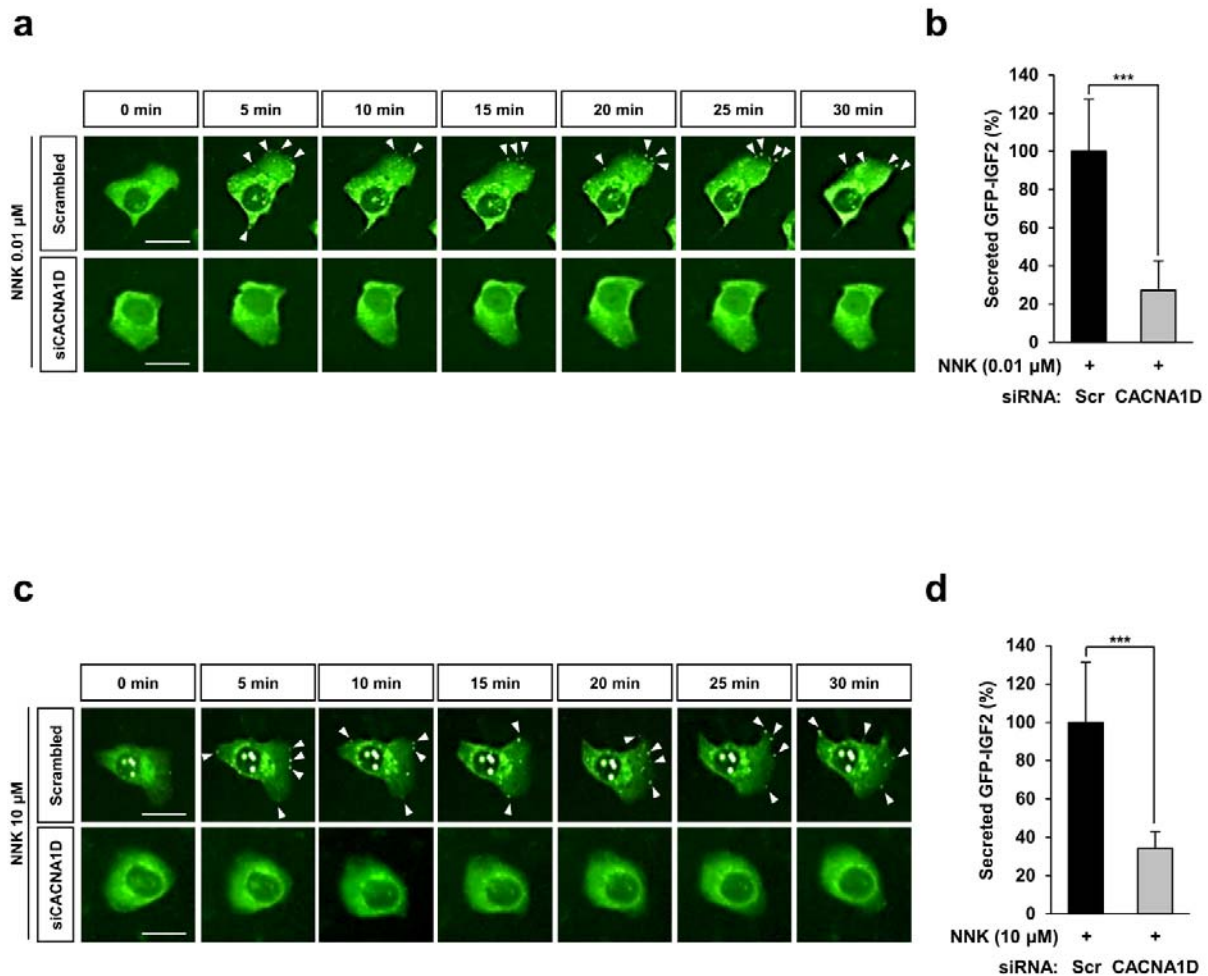

**Supplementary Fig. 17. siRNA-mediated depletion of L-type calcium channel (CACNA1D) inhibits NNK-induced IGF2 secretion.** (a and c) Time-lapse imaging analysis for GFP-IGF2 secretion from BEAS-2B cells. BEAS-2B cells were co-transfected with GFP-IGF2 and the indicated siRNA, and then stimulated with NNK (0.01 or 10  $\mu$ M). (b and d) Quantification of secreted GFP-IGF2 at 30 min after NNK stimulation. Secreted GFP-IGF2 out of 25 BEAS-2B cells treated with NNK (0.01 or 10  $\mu$ M) was quantified using Harmony high-content imaging and analysis software. Data are presented as the mean  $\pm$  SD. \*\*\*  $P < 0.001$ , determined by Student's  $t$ -test. Scale bar: 20  $\mu$ m.

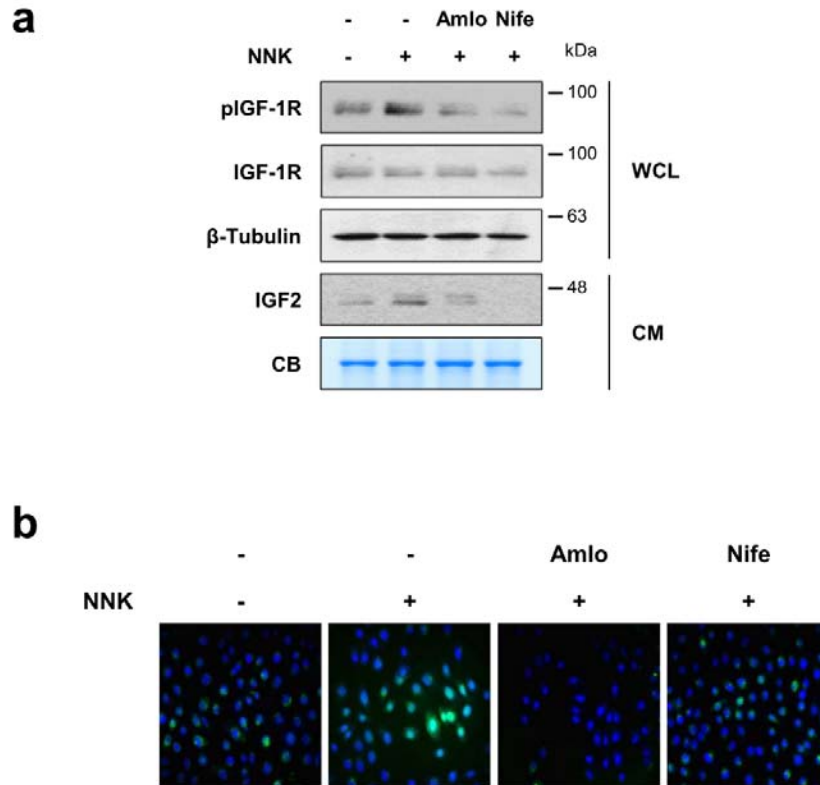

**Supplementary Fig. 18. NNK-induced IGF2 secretion, IGF-1R phosphorylation and increase in intracellular  $\text{Ca}^{2+}$  level are suppressed by calcium channel blockers.** (a) BEAS-2B cells were pretreated with amlodipine (10  $\mu\text{M}$ ) and nifedipine (10  $\mu\text{M}$ ) for 3 h, and then stimulated with NNK (0.01  $\mu\text{M}$ ) for 15 min. Whole cell lysates (WCL) and conditioned media (CM) from these cells were determined by Western blot analysis. (b) HBEL/p53i cells were pretreated with amlodipine (10  $\mu\text{M}$ ) and nifedipine (10  $\mu\text{M}$ ) for 3 h, stained with Fluo-4 AM, and then exposed to NNK (10  $\mu\text{M}$ ) for 15 min. The green fluorescence signals were visualized using fluorescence microscopy. Amlo: amlodipine; Nife: nifedipine.

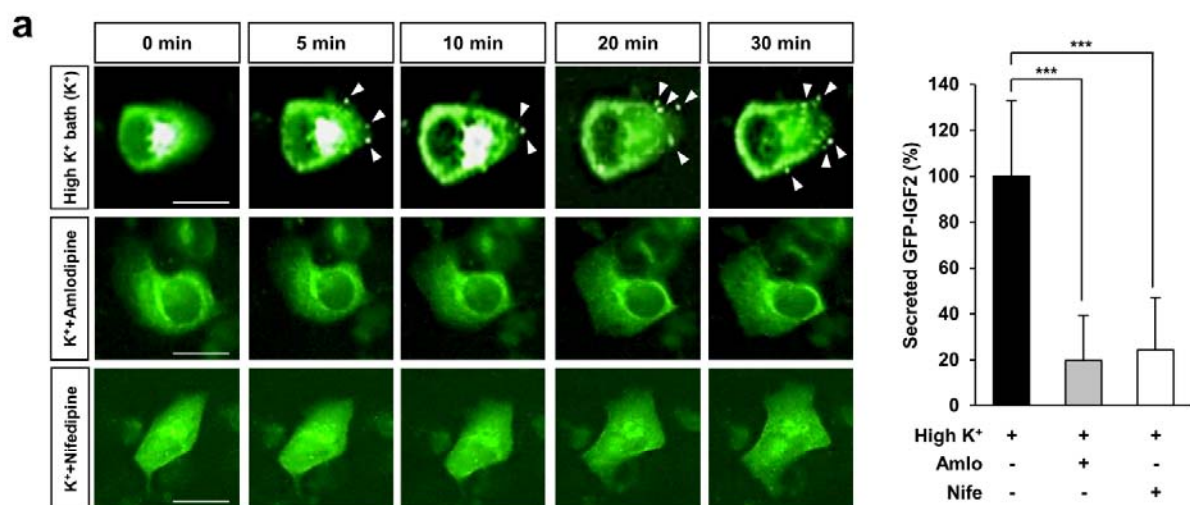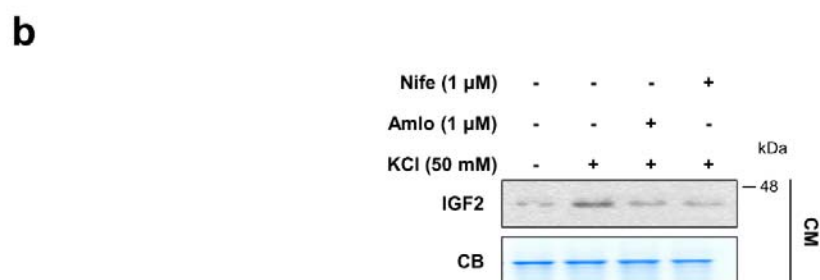

**Supplementary Fig. 19. High [K<sup>+</sup>]-mediated plasma membrane depolarization induces IGF2 secretion via L-type VDCC.** (a) (left) Time-lapse imaging analysis for High K<sup>+</sup> bath-induced GFP-IGF2 secretion from BEAS-2B cells. BEAS-2B cells were transfected with GFP-IGF2 expression vectors, and then incubated with a high K<sup>+</sup> bath after pretreatment with amlodipine (1 μM) and nifedipine (1 μM) for 3 h. (right) Quantification of secreted GFP-IGF2 from 30 cells. Secreted GFP-IGF2 out of 30 BEAS-2B cells exposed to a High K<sup>+</sup> solution in the absence or presence of indicated inhibitors at 30 min after NNK treatment was quantified using Harmony high-content imaging and analysis software. Data are presented as the mean ± SD. \*\*\* *P* < 0.001, determined by Student's *t*-test. Scale bar: 20 μm. (b) BEAS-2B cells were transfected with GFP-IGF2 expression vectors. Cells were pretreated with amlodipine (1 μM) and nifedipine (1 μM) for 3 h, and were treated with KCl (50 mM) for 15 min. IGF2 secretion in the CM was subjected to Western blot analysis.

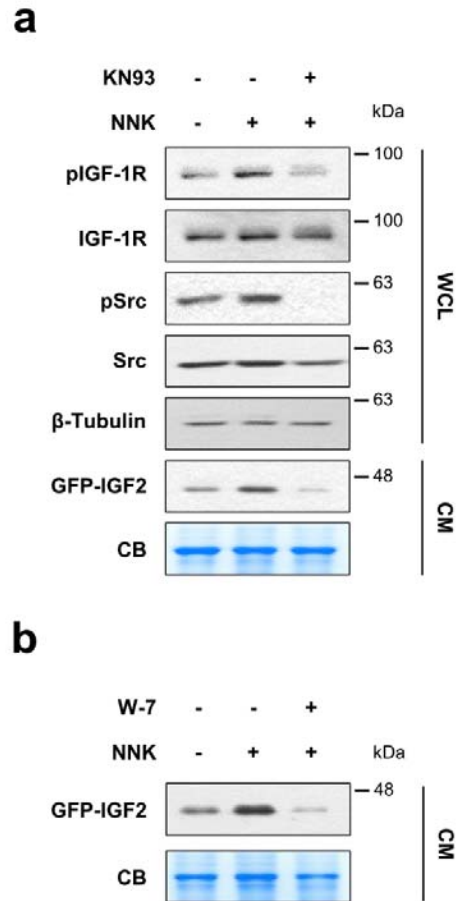

**Supplementary Fig. 20. Calmodulin-mediated Src activation contributes to the NNK-induced IGF2 secretion and IGF-1R phosphorylation.** BEAS-2B/GFP-IGF2 cells were pretreated with KN-93 (a) or W-7 (b) for 3 h and then stimulated with NNK for 15 min. The phosphorylation of IGF-1R and Src in WCL or IGF2 secretion in the CM were determined by Western blot analysis.

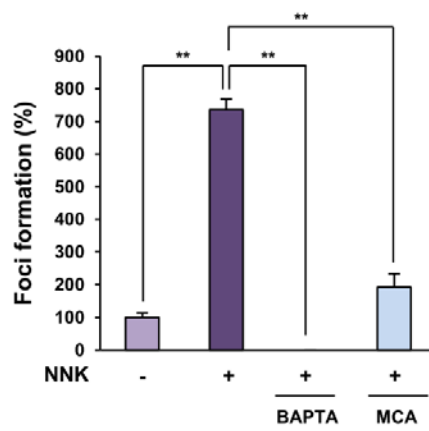

**Supplementary Fig. 21. Blockade of NNK-induced foci formation by treatment with BAPTA-AM or mecamylamine.** Quantification of foci formation in HBEL/p53i cells treated with NNK, alone or in combination with BAPTA-AM (BAPTA) or mecamylamine (MCA). Data are presented as the mean  $\pm$  SD. \*\*:  $P < 0.01$ , determined by Student's  $t$ -test.

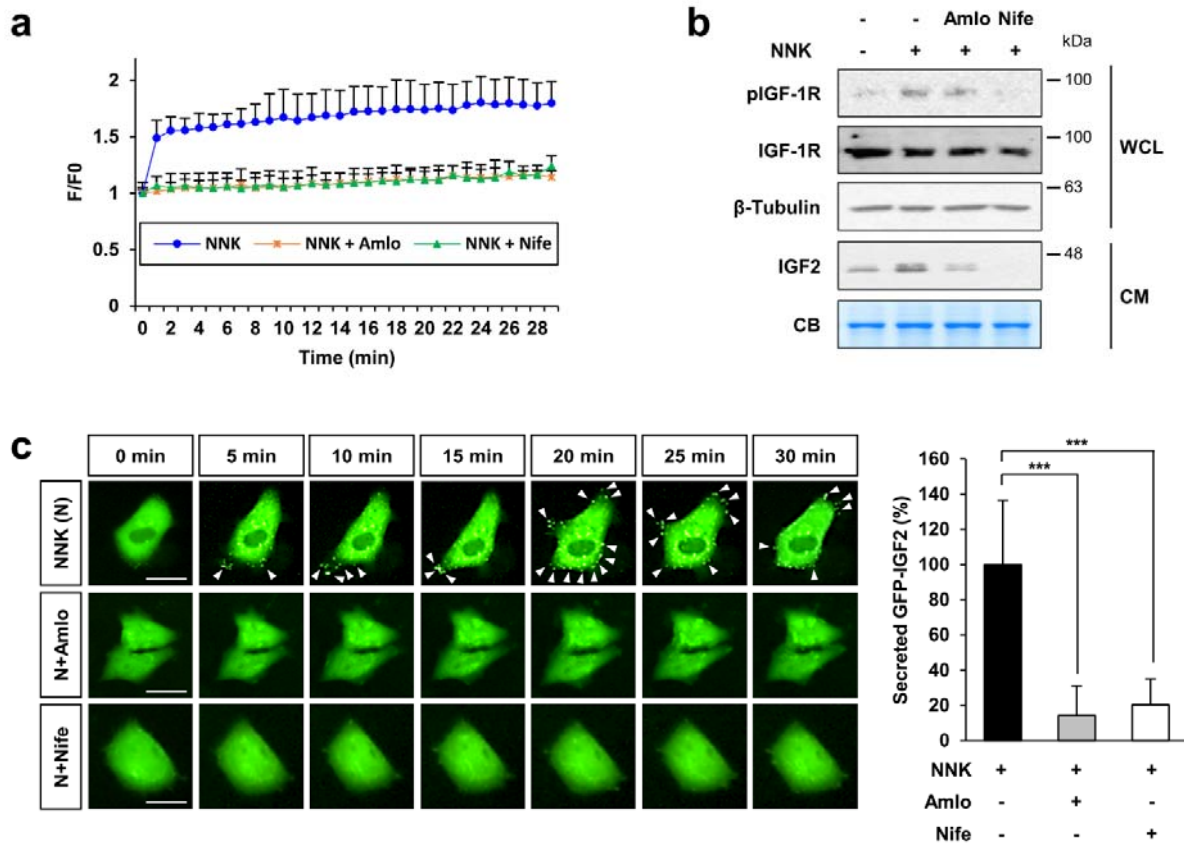

**Supplementary Fig. 22. Low concentration of calcium channel blockers consistently inhibit NNK-induced intracellular  $\text{Ca}^{2+}$  level, IGF2 secretion, and IGF-1R phosphorylation.** (a) Time-lapse imaging of Fluo-4 AM fluorescence signals from HBEL/p53i cells. Cells were pretreated with amlodipine (Aml; 1  $\mu\text{M}$ ) or nifedipine (Nife; 1  $\mu\text{M}$ ) for 3 h, and were exposed to NNK (0.01  $\mu\text{M}$ ) for 30 min. The changes in fluorescence intensity were plotted to show the change in intracellular  $\text{Ca}^{2+}$  levels. Data were normalized to the average fluorescence intensity measured before NNK treatment in the HBEL/p53i cells. ( $n = 4$ , mean  $\pm$  SD) (b) BEAS-2B cells transfected with GFP-IGF2 expression vectors were pretreated with amlodipine (1  $\mu\text{M}$ ) and nifedipine (1  $\mu\text{M}$ ) and then stimulated with NNK (0.01  $\mu\text{M}$ ) for 15 min. WCL and CM from these cells were determined by Western blot analysis. (c) *Left.* Time-lapse images of GFP-IGF2 secretion from BEAS-2B cells. BEAS-2B cells were transfected with GFP-IGF2 expression vectors. Cells were pretreated with amlodipine (1  $\mu\text{M}$ ) and nifedipine (1  $\mu\text{M}$ ) and then exposed to NNK (0.01  $\mu\text{M}$ ). *Right.* Quantification of secreted GFP-IGF2. Secreted GFP-IGF2 out of 25 BEAS-2B cells treated with NNK (0.01  $\mu\text{M}$ ) with or without indicated inhibitors at 30 min after NNK stimulation was quantified using Harmony high content imaging and analysis software. Data are presented as the mean  $\pm$  SD. \*\*\*  $P < 0.001$ , determined by Student's  $t$ -test. Scale bar: 20  $\mu\text{m}$ .

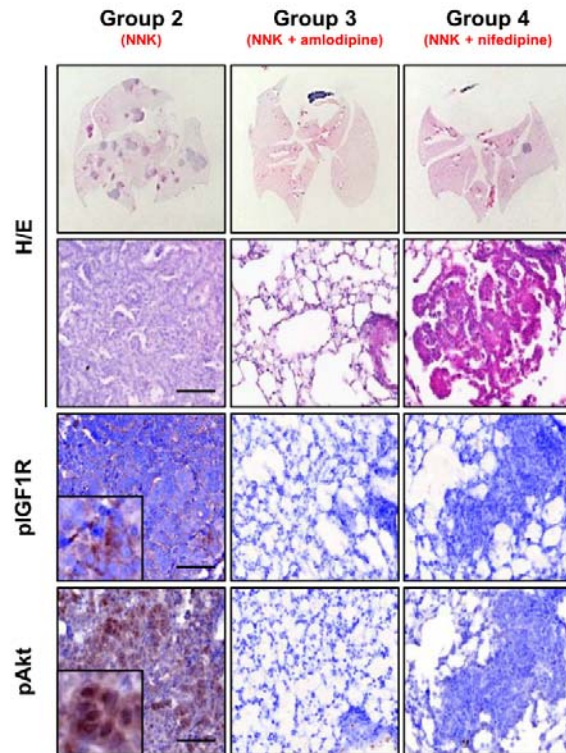

**Supplementary Fig. 23. Regulation of the phosphorylation of IGF-1R and Akt in groups 2 (NNK), 3 (NNK + amlodipine), and 4 (NNK + nifedipine), determined by IHC analysis. Scale bar: 5  $\mu$ m.**



Fig. 3b

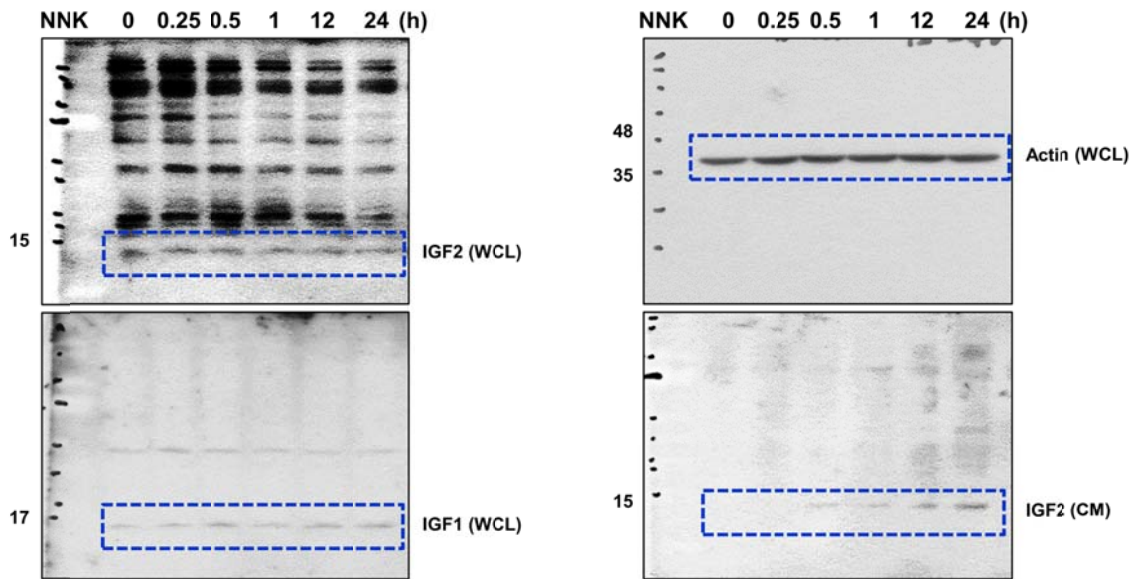

Fig. 3f

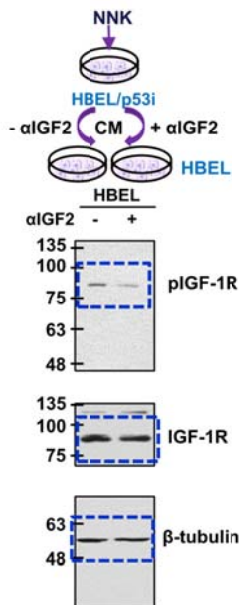

Fig. 4c

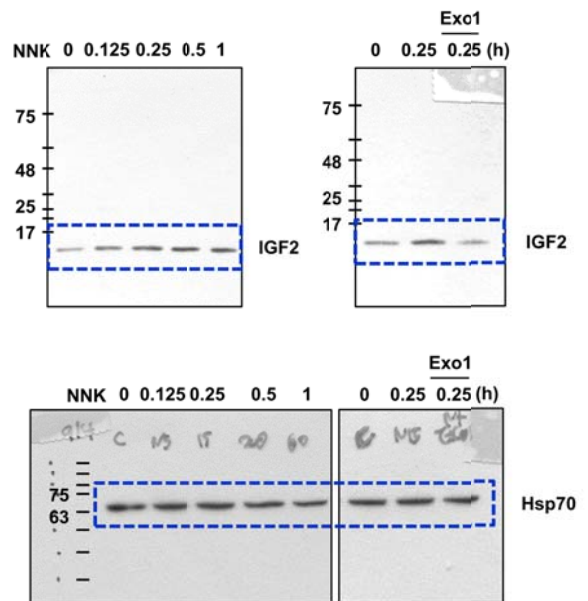

Supplementary Fig. 24. Uncropped, full Western blot images of important blots in indicates figures.



**Fig. 4d**

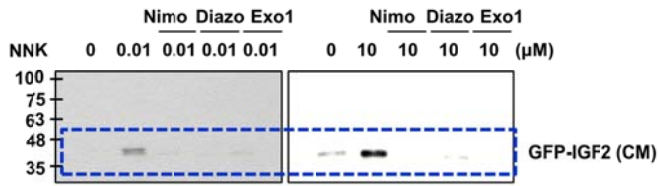

**Fig. 4f**

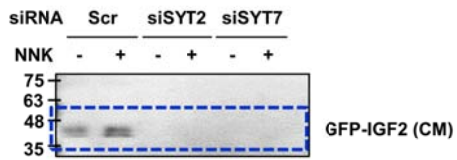

**Fig. 4h**

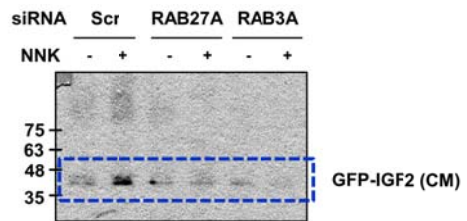

**Fig. 5a**

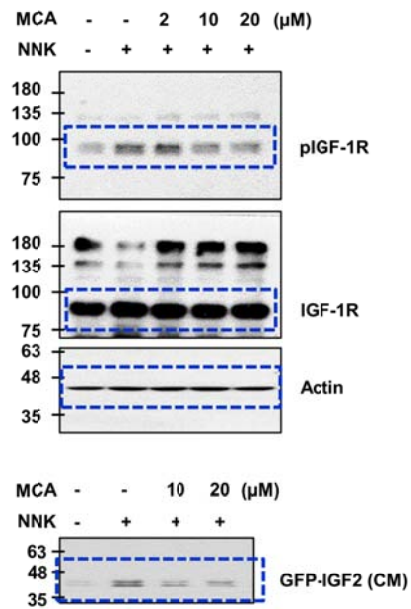

**Fig. 5b**

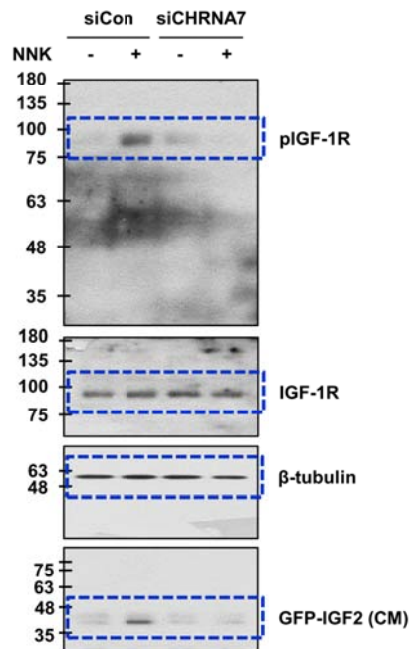

Fig. 5c

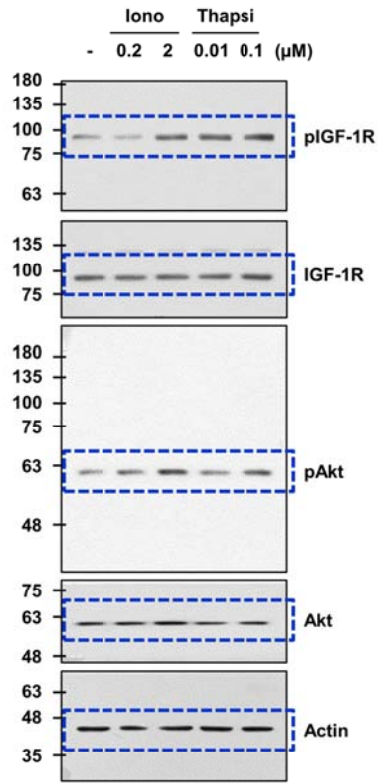

Fig. 5d

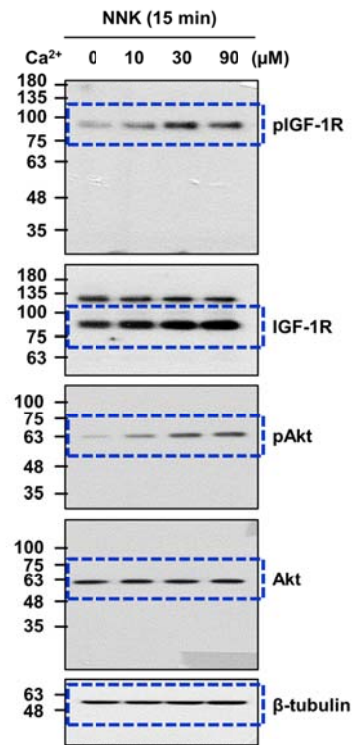

Fig. 5e

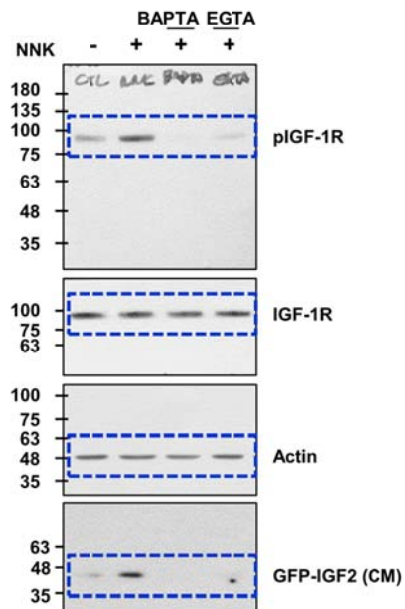

Fig. 5f

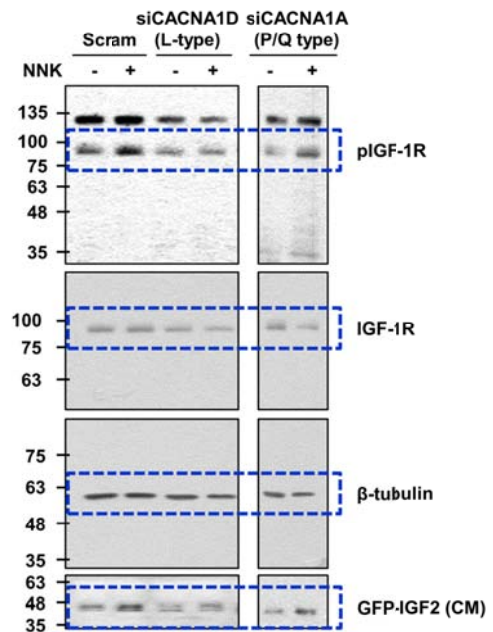

**Fig. 5g**

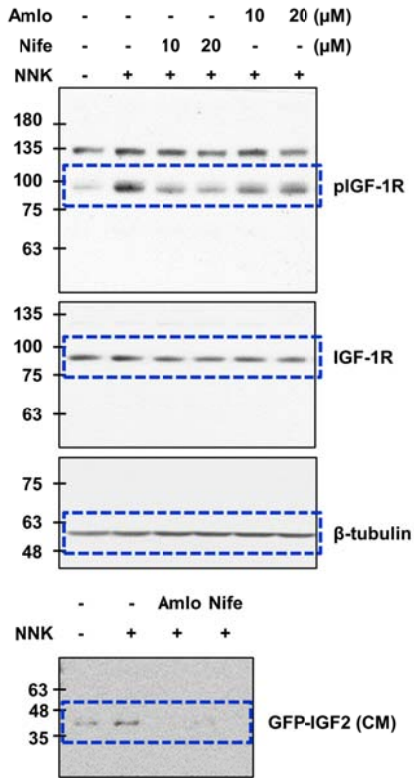

**Supplementary Fig. 2**

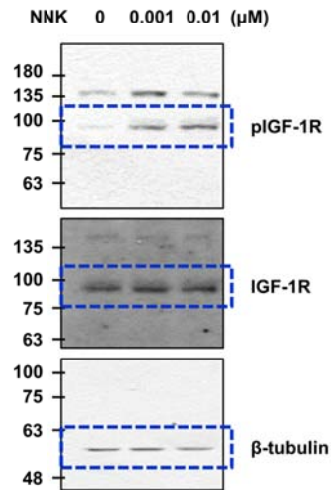

**Supplementary Fig. 6b**

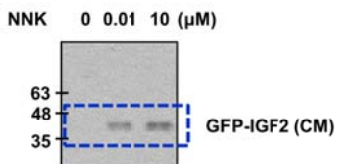

**Supplementary Fig. 8a**

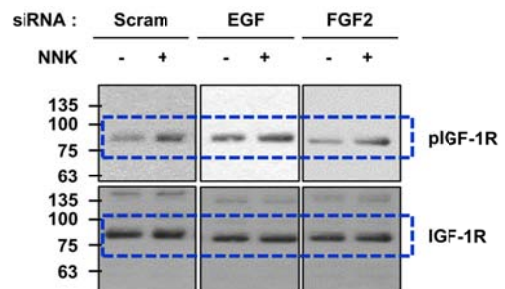

Supplementary Fig. 24. Continued.

Supplementary Fig. 11

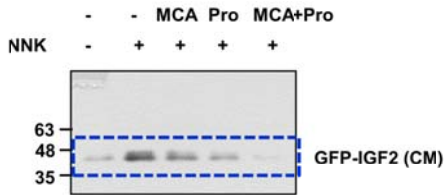

Supplementary Fig. 14

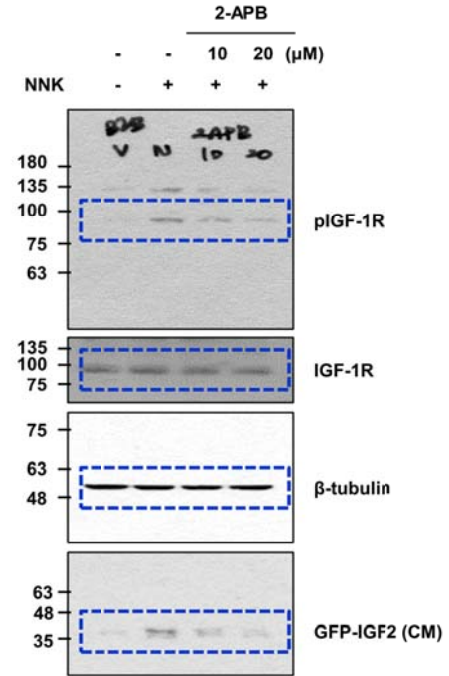

Supplementary Fig. 15

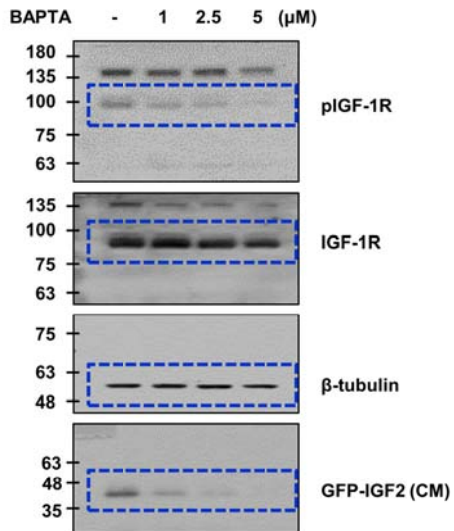

Supplementary Fig. 24. Continued.

Supplementary Fig. 18a

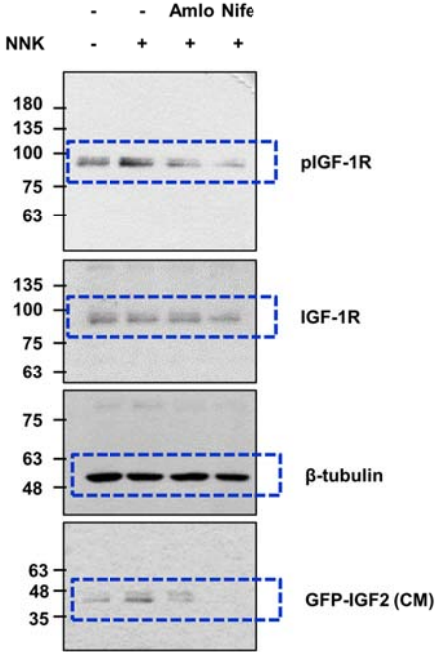

Supplementary Fig. 19b

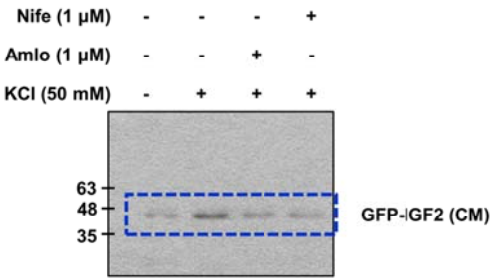

Supplementary Fig. 24. Continued.

Supplementary Fig. 20

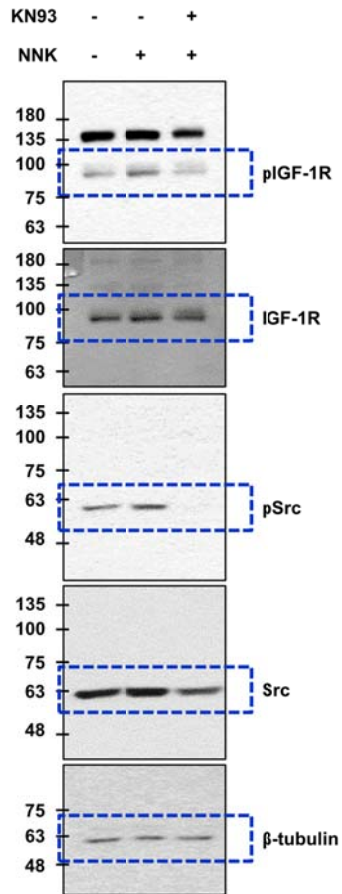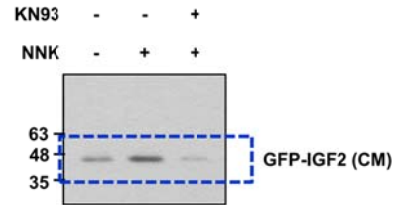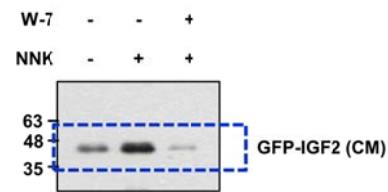

Supplementary Fig. 22b

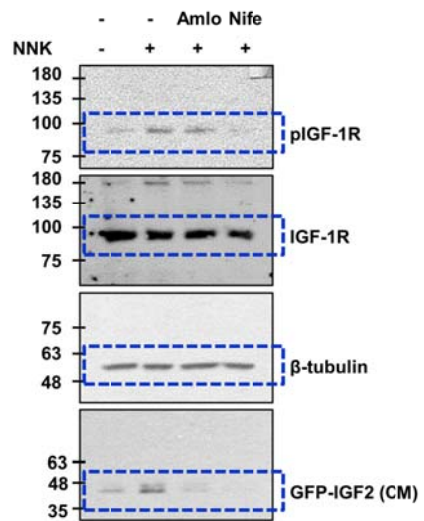

Supplementary Fig. 24. Continued.

**Supplementary Table 1. Patients' demographic characteristics.**

| Type and histology of samples | No.        | Gender <sup>1</sup> |            | Smoking history <sup>2</sup> |           | Smoking status <sup>3</sup> |            |            | Stage      |           |           |           |
|-------------------------------|------------|---------------------|------------|------------------------------|-----------|-----------------------------|------------|------------|------------|-----------|-----------|-----------|
|                               |            | F                   | M          | Yes                          | No        | Never                       | Former     | Current    | I          | II        | III       | IV        |
| <b>Total NSCLC</b>            | <b>354</b> | <b>189</b>          | <b>160</b> | <b>288</b>                   | <b>63</b> | <b>63</b>                   | <b>174</b> | <b>114</b> | <b>226</b> | <b>65</b> | <b>50</b> | <b>12</b> |
| Adenocarcinoma                | 235        | 143                 | 92         | 176                          | 58        | 58                          | 105        | 71         | 160        | 28        | 36        | 10        |
| Squamous cell carcinoma       | 119        | 46                  | 73         | 112                          | 5         | 5                           | 69         | 43         | 66         | 37        | 14        | 2         |
| <b>Total epithelial foci</b>  | <b>367</b> | <b>123</b>          | <b>205</b> | <b>206</b>                   | <b>41</b> | <b>41</b>                   | <b>99</b>  | <b>104</b> | -          | -         | -         | -         |
| Normal                        | 99         | 46                  | 53         | 52                           | 15        | 15                          | 23         | 30         | -          | -         | -         | -         |
| Hyperplasia                   | 163        | 49                  | 114        | 97                           | 17        | 17                          | 46         | 51         | -          | -         | -         | -         |
| Squamous metaplasia           | 20         | 10                  | 10         | 13                           | 0         | 0                           | 7          | 6          | -          | -         | -         | -         |
| Low-grade dysplasia           | 29         | 4                   | 24         | 18                           | 2         | 2                           | 9          | 5          | -          | -         | -         | -         |
| High-grade dysplasia          | 56         | 14                  | 42         | 26                           | 7         | 7                           | 14         | 12         | -          | -         | -         | -         |

<sup>1</sup>Gender information was not available in 5 NSCLCs and 39 epithelial specimens.

<sup>2</sup>Smoking history was not available in 3 NSCLCs and 120 epithelial specimens.

<sup>3</sup>Smoking status was not available in 11 NSCLCs and 123 epithelial specimens.

**Supplementary Table 2. Total number of patients and the study population\*.**

|          | Total number of patients |                       | Study population |                    |
|----------|--------------------------|-----------------------|------------------|--------------------|
|          | Un-weighted              | Weighted (95% CI)     | Un-weighted      | Weighted (95% CI)  |
| NPS 2010 | 1.36                     | 45.45 (45.40 – 45.51) | 0.22             | 7.44 (7.41 – 7.46) |
| NPS 2011 | 1.37                     | 45.51 (45.46 – 45.57) | 0.23             | 7.62 (7.59 – 7.64) |

\*Study population includes all patients who were aged 20 years and older and had one or more records with hypertension and hypertension-related diagnoses. All figures are expressed in millions.



**Supplementary Table 3. Demographic characteristics of the study population, NPS 2010-2011\*.**

|                                  | No. of population (frequency; %) | 95% CI                  |
|----------------------------------|----------------------------------|-------------------------|
| <b>Overall population visits</b> | <b>15,054,548 (100)</b>          |                         |
| <b>Gender</b>                    |                                  |                         |
| Male                             | 7,060,496 (46.90)                | 7,060,432 – 7,060,553   |
| Female                           | 7,994,052 (53.10)                | 7,993,995 – 7,994,116   |
| <b>Age group</b>                 |                                  |                         |
| 20-34                            | 246,679 (1.64)                   | 246,667 – 246,699       |
| 35-49                            | 2,152,615 (14.30)                | 2,152,559 – 2,152,680   |
| 50-64                            | 5,886,502 (39.10)                | 5,886,449 – 5,886,554   |
| 65-79                            | 5,460,185 (36.27)                | 5,450,785 – 5,469,588   |
| 80 and older                     | 1,308,566 (8.69)                 | 1,299,147 – 1,317,981   |
| <b>Public Insurance Scheme</b>   |                                  |                         |
| Health insurance                 | 13,991,878 (92.94)               | 13,980,707 – 14,003,048 |
| Medicaid                         | 1,019,839 (6.77)                 | 1,008,896 – 1,030,785   |
| Veteran healthcare               | 42,831 (0.29)                    | 40,497 – 45,164         |
| <b>Calcium channel blocker</b>   |                                  |                         |
| Dihydropyridines                 | 8,484,325 (56.36)                | 8,462,613 – 8,506,030   |
| Non-dihydropyridines             | 486,839 (3.23)                   | 479,066 – 494,602       |
| Lung cancer                      | 89,631 (0.60)                    | 86,248 – 93,007         |

\*All figures are based on weighted analysis.

**Supplementary Table 4. Primer sequences used for RT-PCR analysis.**

| Gene          | Forward (5'-3')            | Reverse (5'-3')       |
|---------------|----------------------------|-----------------------|
|               | <b>SNAREs <sup>1</sup></b> |                       |
| <i>STX1A</i>  | GGAGCTGGAAGAACTCATGT       | CCACATTGTAICTGATCCTG  |
| <i>STX1B</i>  | GAGGATCTCACTGCAGACAT       | ATGCGGTCAATCATCTCTCC  |
| <i>STX2</i>   | TTCTTTCTGCACCAAACCCG       | GTCTCCAGCTTCATGATGTC  |
| <i>STX3</i>   | CACTCTGTCTTTCTCGGAA        | TTCAGCCCAACGGAAAAGTCC |
| <i>STX4</i>   | ATCCTGAAGGACACGCAGGT       | TTATCCAACCACTGTGACGC  |
| <i>STX5</i>   | AACTGGCTTCTATGTCCAATG      | GGTGACAGACTGGAAGTACT  |
| <i>STX6</i>   | AGTACTCGGCAAGTTGTCAG       | ACTGAGTGCTCTCCAATTCCG |
| <i>STX7</i>   | GGAACACCTCAAGATTCACC       | TGAACGTGCACCTCTGCATT  |
| <i>STX8</i>   | CCGTGACAATCAGAGCTTTG       | GGTTGGCAAGGTCGTCAATT  |
| <i>STX10</i>  | TGAAGGACCATATGGTCAGC       | TGGGTGTGGTCCATCTCTTG  |
| <i>STX11</i>  | CTTCTCGGTTGCGACTCTC        | CAGTTGTGCGCTGCTTCAT   |
| <i>STX12</i>  | CAGCTCGCCAAGGAAACAAA       | CTCTGAGCTTTCCACATTGG  |
| <i>STX16</i>  | ATGACAGCAGCGAAGAGGAA       | ATCTGGCGAATCTCTCGTTC  |
| <i>STX17</i>  | GAAGCATCAGCAGCAACAGC       | GTC AATCTTCTCCTGCTGAG |
| <i>STX18</i>  | CAAGGAGATACATTCCAGC        | GGAAATCTCAACCACTCTC   |
| <i>STX19</i>  | CTCTCAAAGGCAGGACTCCA       | CTTCTCATTGAAGCCACCAG  |
| <i>VIT1A</i>  | ATCGCCTACAGTGACGAAGT       | GCCAGAGACAGGTTACATTG  |
| <i>VIT1B</i>  | ATATATGCTGTAGAGAATGAGC     | TGGAAAGCAGCAGCTTGTG   |
| <i>SNAP23</i> | CAAGACCATCACTATGCTGG       | ACTTGAGTCAGGTTCTCTTC  |
| <i>SNAP25</i> | TGCTGCAACTGGTTGAAGAG       | CTTCTCCATGATCCTGTGGA  |
| <i>SNAP29</i> | GAAGATGGTGGACAAGATGG       | CTAGGTTGCTGTGATCTTC   |
| <i>VAMP1</i>  | CTCCTCCTAACATGACCAGT       | CTACCACGATGATGGCACAG  |
| <i>VAMP2</i>  | CCAAACCTCACCAGTAACAG       | TGGCGCAAATCACTCCCAAG  |
| <i>VAMP3</i>  | GTCTACAGGTCCAAGTCTG        | GAACAGTAATCCCGATTGCC  |
| <i>VAMP4</i>  | CCTTCGAAGTTGTTGGATC        | GGACCAAGATTTGGACCTAG  |
| <i>VAMP5</i>  | AGGAATAGAGTTGGAGCGGT       | ACTACTGCTGTCACTGCTCT  |
| <i>VAMP7</i>  | CGGTTCAAGAGCACAGACAG       | CTTCATACACATGGCTCGAG  |
| <i>VAMP8</i>  | GAAGGTGGAGGAAATGATCG       | CTTCTGCGATGTCGTCTTGA  |
| <i>UNC13A</i> | AATTGCCAAGCCACTCAGAC       | CCAGAAGTCTGCCACTTGAG  |

|               |                      |                      |
|---------------|----------------------|----------------------|
| <i>UNC13B</i> | CTGATCTTCACTGCTGCCAA | TCTGCCACTTGAGGTCATTG |
| <i>UNC13C</i> | GAGCACATGATTCGAGAGGA | GAACATTGCTGTGGTCTGCC |
| <i>UNC13D</i> | AGTCTGTCCTGCCTGAGGAT | AGGTCCTTCTTGCTTCTG   |

**VDCC subunits** <sup>2, 3, 4, 5</sup>

|                 |                           |                           |
|-----------------|---------------------------|---------------------------|
| <i>CACNA1C</i>  | GCCGCGCCGCAGTCAAGTCTA     | GCTCCTCCGGGTCTGCATCTCATC  |
| <i>CACNA1S</i>  | CGCATCGTCAATGCCACCTGGTTTA | AGCACATTGTGCGAAGTGAAGTCGC |
| <i>CACNA1D</i>  | GTGCCCTGCACACAGTAGTCGC    | GGCGCGGGCAGGTCCGGCTGTTGG  |
| <i>CACNA1F</i>  | AGGGACCCCTAAGCGAAGAAACCAG | ACCCCATGGCATCTTGCATCCAGTA |
| <i>CACNA1A</i>  | TCCTCAAGCATTCCGGTGGAC     | TGCAGGCCCTCTCATTTTTTC     |
| <i>CACNA1B</i>  | GGAAGTACTTCGACCTGCGAACAC  | CCTCCTCTGCGTGGATCAGGTCAT  |
| <i>CACNA1E</i>  | TCTGCCATCTACTTCATTGTG     | CTCCTTGCCTTCTGTCTCT       |
| <i>CACNA1G</i>  | TGTCTCCGCACGGTCTGTAA      | AAGCCGGTCCAAGTGTCTC       |
| <i>CACNA1H</i>  | CCTGATCCCTACGAGAAGATCCCGC | CACGGCTGAAGTACTTGCTGTCCAC |
| <i>CACNA1I</i>  | AGATGCCCTTCATCTGCTCCCTGTC | AAGATCTCCTCGTAGCAGTCGCCAG |
| <i>CACNB1</i>   | ATGCACGAGTACCCAGGGGAG     | CAGCGCAGTAGCGGGCCTTATT    |
| <i>CACNB2</i>   | TCGCTTGCCAAACGCTCGGT      | ATGACGGCTGCGCTGCTTGT      |
| <i>CACNB3</i>   | GCAGCAGCTCGAAAGGGCCA      | ATGCTGGAGCGGGCAGAGGA      |
| <i>CACNB4</i>   | TGAAGACTCGGAGGCTGGTTCAGC  | TGGACCGGGTGTTCGAACGT      |
| <i>CACNA2D1</i> | TGCTCATCGGCCCTCGTCCG      | CCAGGCGCACCCAGGGCTTTAG    |
| <i>CACNA2D2</i> | AGCCTAGGCAGGCGCACACT      | TCTGCACTAGTCCACTGCTCCGG   |
| <i>CACNA2D3</i> | GGACGAGAGGCTGCGTTTGCA     | GGGCCGGCTAAGCACGTGAA      |
| <i>CACNA2D4</i> | TGGCCTGGGCCTTTGTGCAG      | GCCTCCTCGGCAGTTCCAC       |
| <i>CACNG1</i>   | TGCTGGCCATGACAGCCGTG      | AACATGGACGCGGGTCCGAG      |
| <i>CACNG2</i>   | TCTCTGGGCCTTAATTTTCCCC    | TTTTACAGACCCCCAAAGACA     |
| <i>CACNG3</i>   | CTCCCCTTCCCCTTCTCTAAC     | AGCTGGGATTTCTTTCTGGAG     |
| <i>CACNG4</i>   | TTTGACGAAGGTTGTGCTG       | TTGCTCTCCTGGCGTTGATT      |
| <i>CACNG5</i>   | GATCAAGATGTCCCTGCACTCA    | CAGAGACAAAGGCCAGTATCGT    |
| <i>CACNG6</i>   | TGCTCAGTAAAGGTGCAGAGTT    | CTCGGTGGTTGCTTAGAGAAGT    |
| <i>CACNG7</i>   | ACTGGCTGTACATGGAAGAAGG    | TGAAATAAGGGAGTCTGTGGGC    |
| <i>CACNG8</i>   | TGCTGAAGCATAGTCATGGTGT    | CCTCTGCCTTCTCAGTGAACCT    |

**Synaptotagmins**

|             |                       |                         |
|-------------|-----------------------|-------------------------|
| <i>SYT1</i> | CGCCCCTGTCACCACTGTTGC | CCTTGGGCTCTTCTTTTCTTCTC |
| <i>SYT2</i> | GCTCCGGCCACCACCACTG   | GTCTCCGCGTCGTCATCATCCTG |

|              |                          |                         |
|--------------|--------------------------|-------------------------|
| <i>SYT3</i>  | ACCATCCACCATTTGCTGAACTG  | GGTGGTGGGTGCTAGACTTGTGA |
| <i>SYT5</i>  | GGATTGGCAGCCTTGGATCT     | CCCCAAGCTTCTCCTCCTCC    |
| <i>SYT6</i>  | TCCCTACTATGTGATGGGCG     | GGGTTCCCTCTTTGAAGGATTT  |
| <i>SYT7</i>  | ATCACCGTCAGCCTTAGCGTCACT | TCGGAGCCTGGGGAGAGCAT    |
| <i>SYT9</i>  | GGCAGGCTGACCATTACCAT     | CCCATGGTCATCGTTTCTCCA   |
| <i>SYT10</i> | GCTTTTGTGGACTGGCCTTG     | TCTTCGGAAGGAACTGTGGC    |
| <i>SYT11</i> | TCGGTGACCGTCTTTGTCTG     | TCCATCTTCGGCAAGTGTCT    |

**Others**

|               |                      |                      |
|---------------|----------------------|----------------------|
| <i>RAB3A</i>  | TTCCGCTATGCTGACGACTC | GTTTCCTACCAGCAGCACCT |
| <i>RAB27A</i> | AGAGGCCAGAGAATCCACCT | CACACCGTTCCATTGCTTC  |
| <i>CHRNA7</i> | GTCCCTGCAAGGCGAGTT   | TATGCCTGGAGGCAGGTACT |
| <i>ACTB</i>   | ACTACCTCATGAAGATC    | GATCCACATCTGCTGGAA   |

---

**Supplementary Table 5. Primer sequences used for real-time PCR analysis.**

| Gene         | Forward (5'-3')         | Reverse (5'-3')        |
|--------------|-------------------------|------------------------|
| <i>IGF1</i>  | ATGTATTGCGCACCCCTCAA    | GGGCACGGACAGAGCG       |
| <i>IGF2</i>  | CCGTGCTTCCGGACAACCTT    | CTGCTTCCAGGTGTCATATTGC |
| <i>IGF1R</i> | TGAAAGTGACGTCCTGCATTTTC | GGTACCGGTGCCAGGTTATG   |
| <i>INSR</i>  | GAGACGCAGAGATGCAGC      | AGGAGCCCAATGGTCTGA     |
| <i>ACTB</i>  | GCGAGAAGATGACCCAGATC    | GGATAGCACAGCCTGGATAG   |

## Supplementary References

1. Pattu V, *et al.* SNARE protein expression and localization in human cytotoxic T lymphocytes. *European journal of immunology* **42**, 470-475 (2012).
2. Park JY, *et al.* Molecular identification of Ca<sup>2+</sup> channels in human sperm. *Exp Mol Med* **35**, 285-292 (2003).
3. Sousa SR, Vetter I, Ragnarsson L, Lewis RJ. Expression and pharmacology of endogenous Cav channels in SH-SY5Y human neuroblastoma cells. *PLoS one* **8**, e59293 (2013).
4. Sheppard BJ, Williams M, Plummer HK, Schuller HM. Activation of voltage-operated Ca<sup>2+</sup>-channels in human small cell lung carcinoma by the tobacco-specific nitrosamine 4-(methylnitrosamino)-1-(3-pyridyl)-1-butanone. *Int J Oncol* **16**, 513-518 (2000).
5. Yu Y, Richardson DR. Cellular iron depletion stimulates the JNK and p38 MAPK signaling transduction pathways, dissociation of ASK1-thioredoxin, and activation of ASK1. *The Journal of biological chemistry* **286**, 15413-15427 (2011).
